# Supplementary material
Source: PubMed Central journal article supplement (PMC4262741)

# Supplemental Figure 1

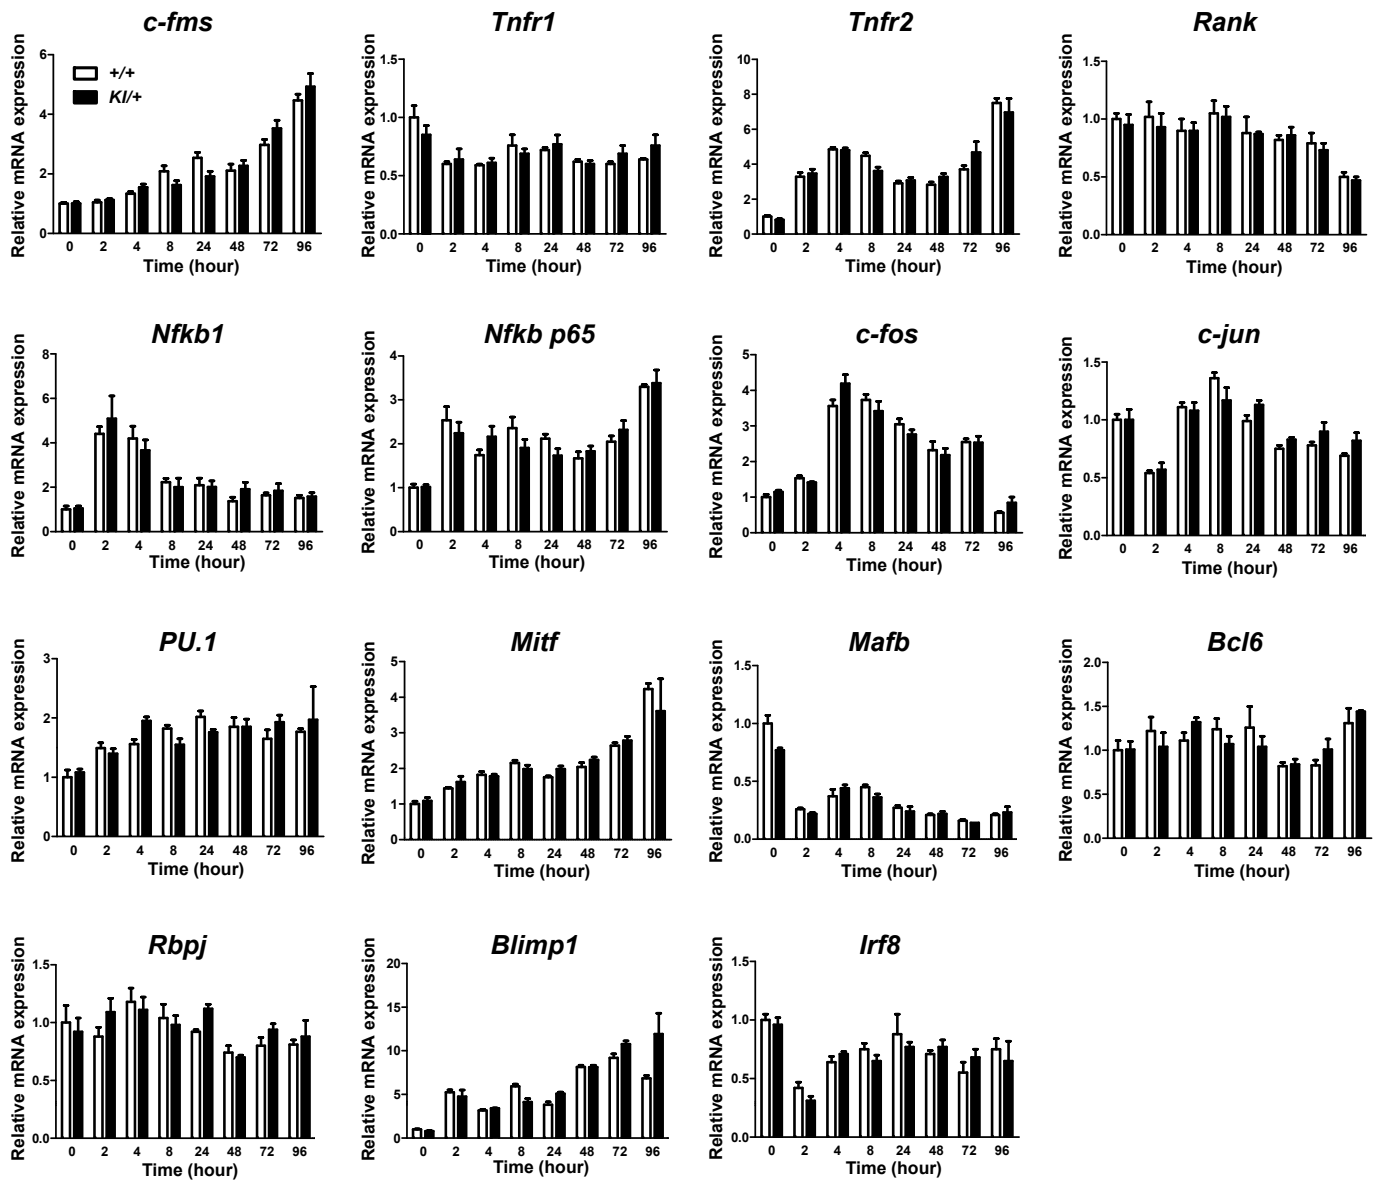

# Supplemental Figure 2

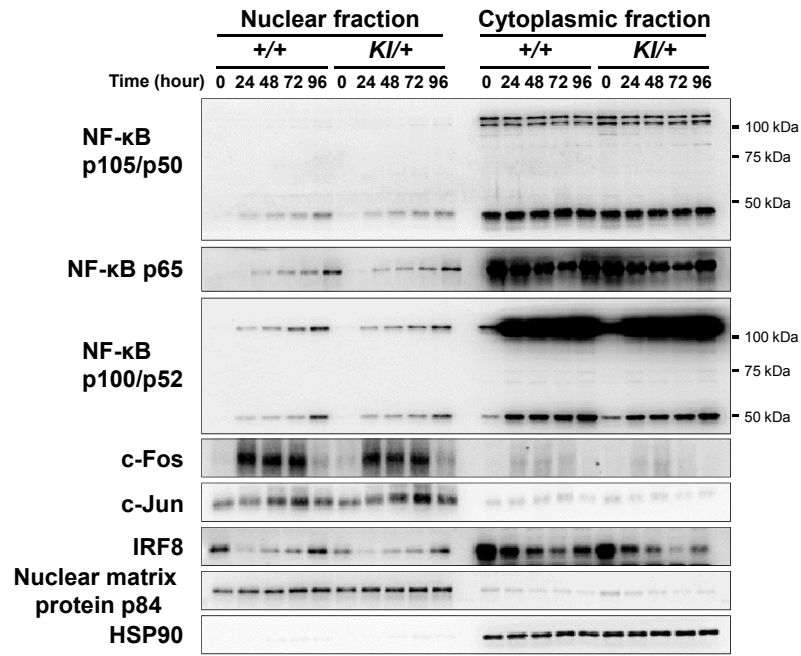

# Supplemental Figure 3

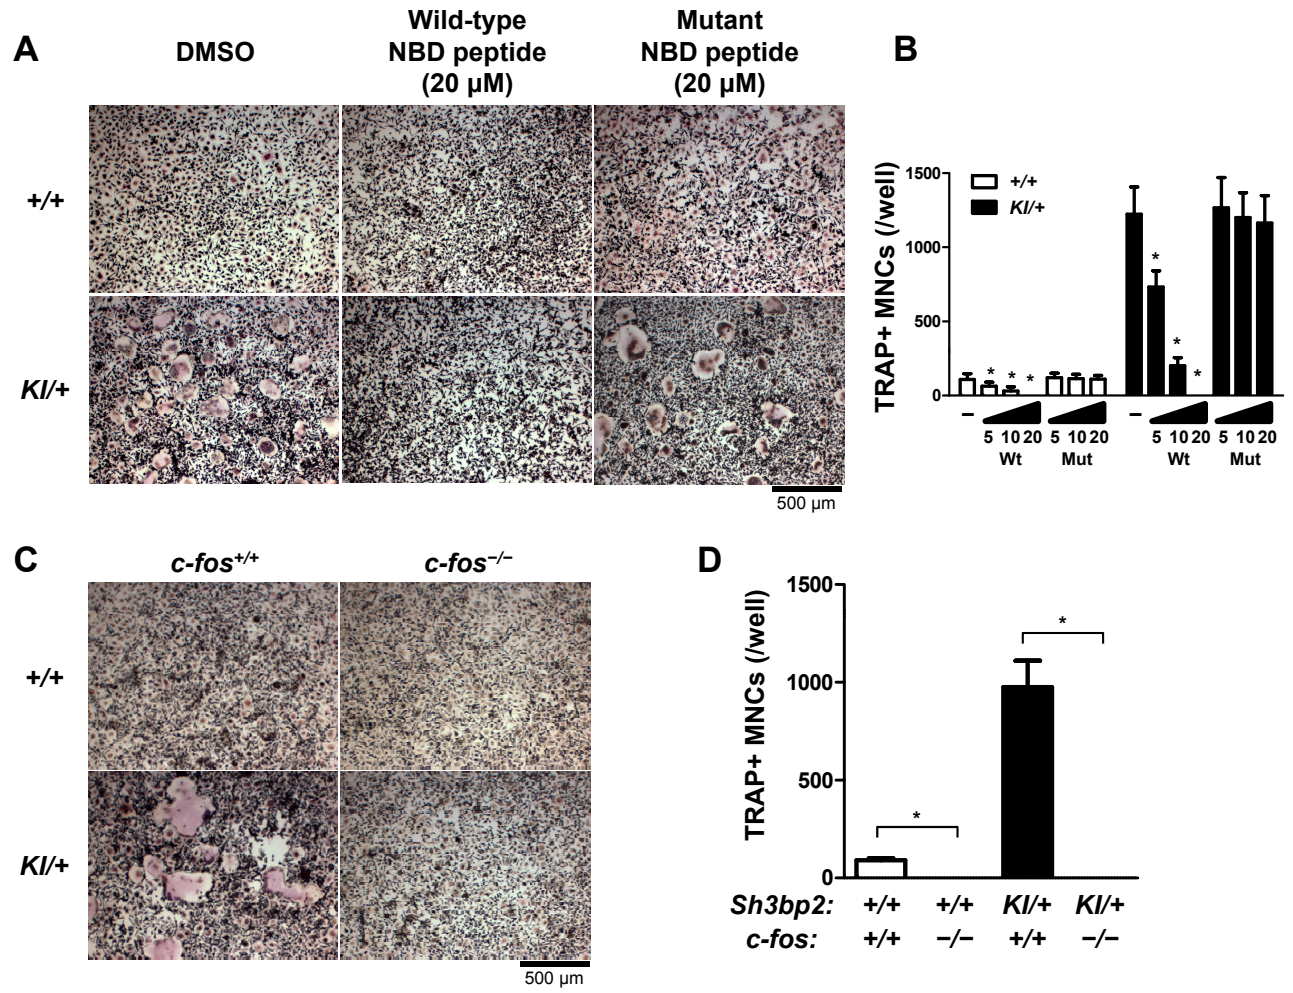

# Supplemental Figure 4

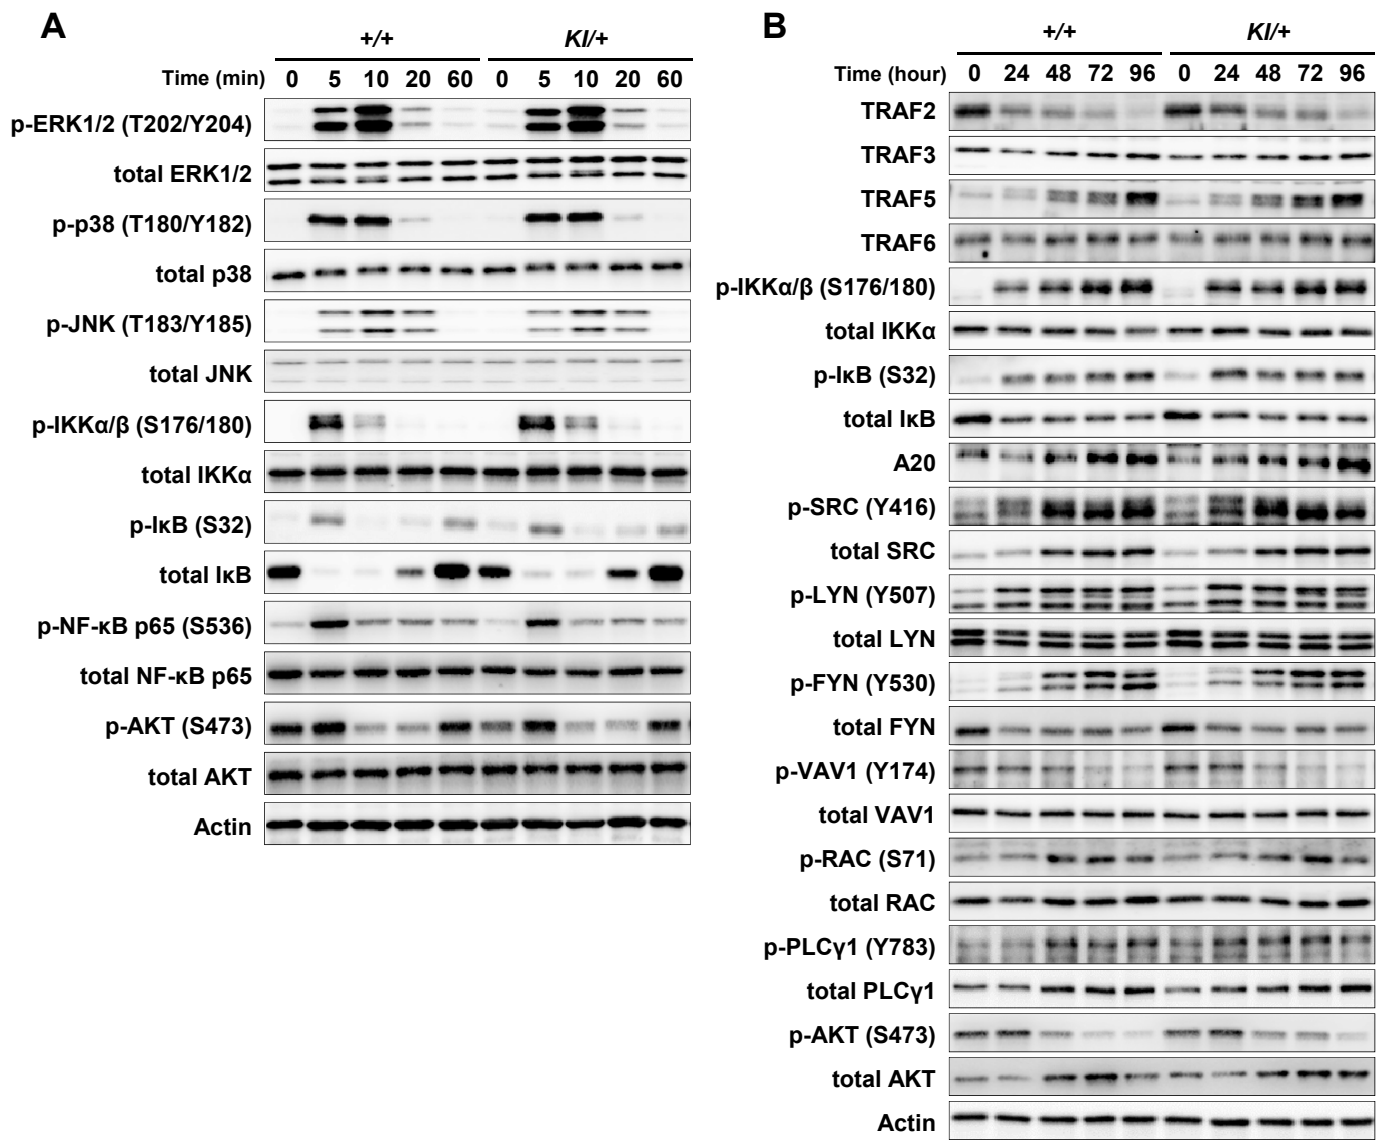



# Supplemental Figure 5

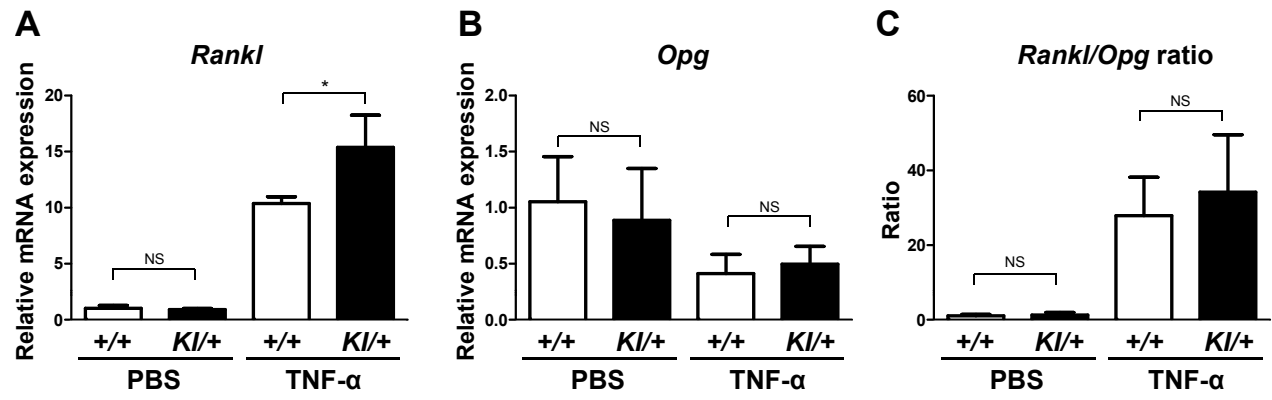

Supplement: NIHMS607922-supplement-Supp_FigureS1-S5.pdf [file NIHMS607922-supplement-Supp_FigureS1-S5.pdf]
